# Supplementary material for: Anticancer Effects of Five Biflavonoids from Ginkgo Biloba L. Male Flowers In Vitro
Source: PubMed Central journal article supplement (PMC6514578; doi:10.3390/molecules24081496), 2019-04-16
Supplement: molecules-24-01496-s001.pdf [file molecules-24-01496-s001.pdf]

## **Supporting information for**

### **Anticancer Effects of Five Biflavonoids from *Ginkgo biloba* L. Male Flowers *in Vitro***

Min Li<sup>a</sup>, Dan Zhang<sup>a,b</sup>, Bin Li<sup>a</sup>, Ziming Xia<sup>a</sup>, Fengjun Xiao<sup>a</sup>, Ying Tian<sup>a</sup>, Wenjing Rui<sup>a</sup>,  
Junxing Dong<sup>\*a</sup>

<sup>a</sup> *Beijing Institute of Radiation Medicine, Beijing 100850, People's Republic of China*

<sup>b</sup> *Jilin University, Changchun 130012, People's Republic of China*

Figure S1.  $^1\text{H}$ -NMR spectrum of Amentoflavone 7''-O- $\beta$ -D-glucopyranoside (1) in  $\text{DMSO-}d_6$

Figure S2.  $^{13}\text{C}$ -NMR spectrum of Amentoflavone 7''-O- $\beta$ -D-glucopyranoside (1) in  $\text{DMSO-}d_6$

Figure S3. HSQC spectrum of Amentoflavone 7''-O- $\beta$ -D-glucopyranoside (1) in  $\text{DMSO-}d_6$

Figure S4. HMBC spectrum of Amentoflavone 7''-O- $\beta$ -D-glucopyranoside (1) in  $\text{DMSO-}d_6$

Figure S5. H-H COSY spectrum of Amentoflavone 7''-O- $\beta$ -D-glucopyranoside (1) in  $\text{DMSO-}d_6$

Figure S6. NOESY spectrum of Amentoflavone 7''-O- $\beta$ -D-glucopyranoside (1) in  $\text{DMSO-}d_6$

Figure S7. HR-ESI-MS spectrum of Amentoflavone 7''-O- $\beta$ -D-glucopyranoside (1)

Figure S8. IR spectrum of Amentoflavone 7''-O- $\beta$ -D-glucopyranoside (1)

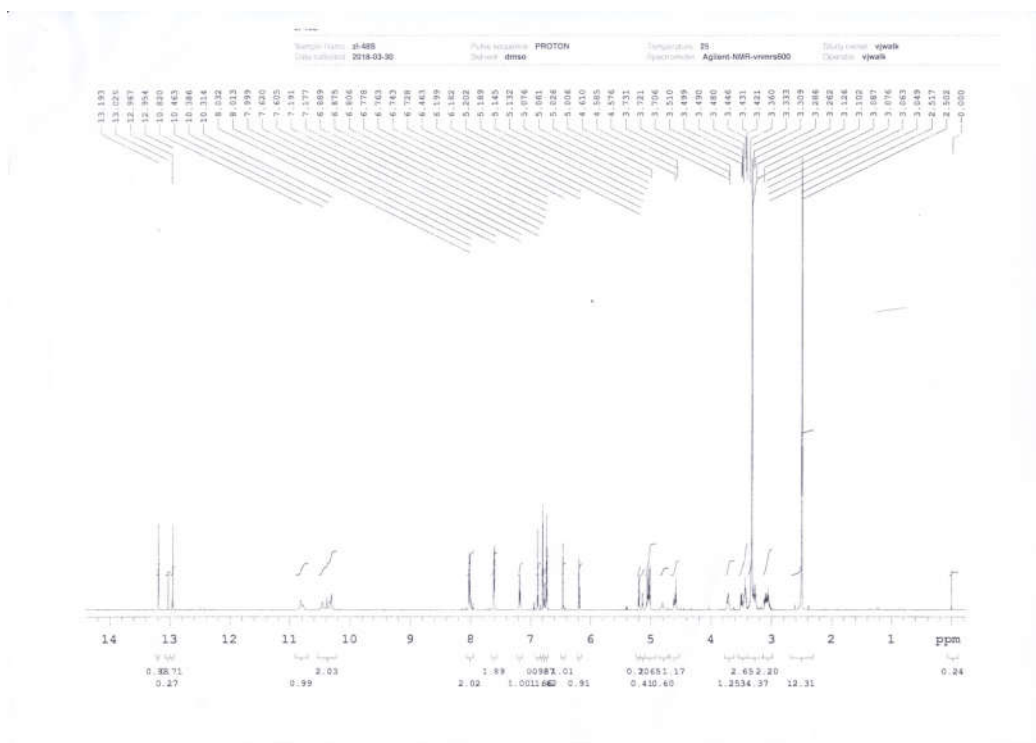

Figure S1.  $^1\text{H-NMR}$  spectrum of Amentoflavone 7''-O- $\beta$ -D-glucopyranoside (1) in  $\text{DMSO-}d_6$

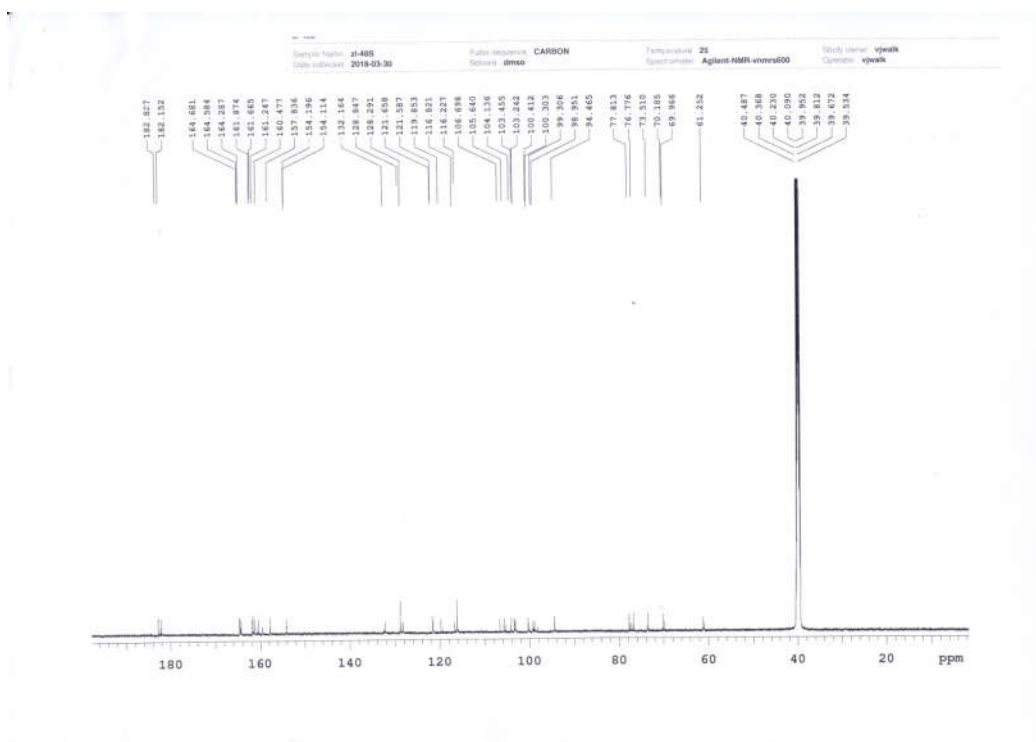

Figure S2.  $^{13}\text{C-NMR}$  spectrum of Amentoflavone 7''-O- $\beta$ -D-glucopyranoside (1) in  $\text{DMSO-}d_6$

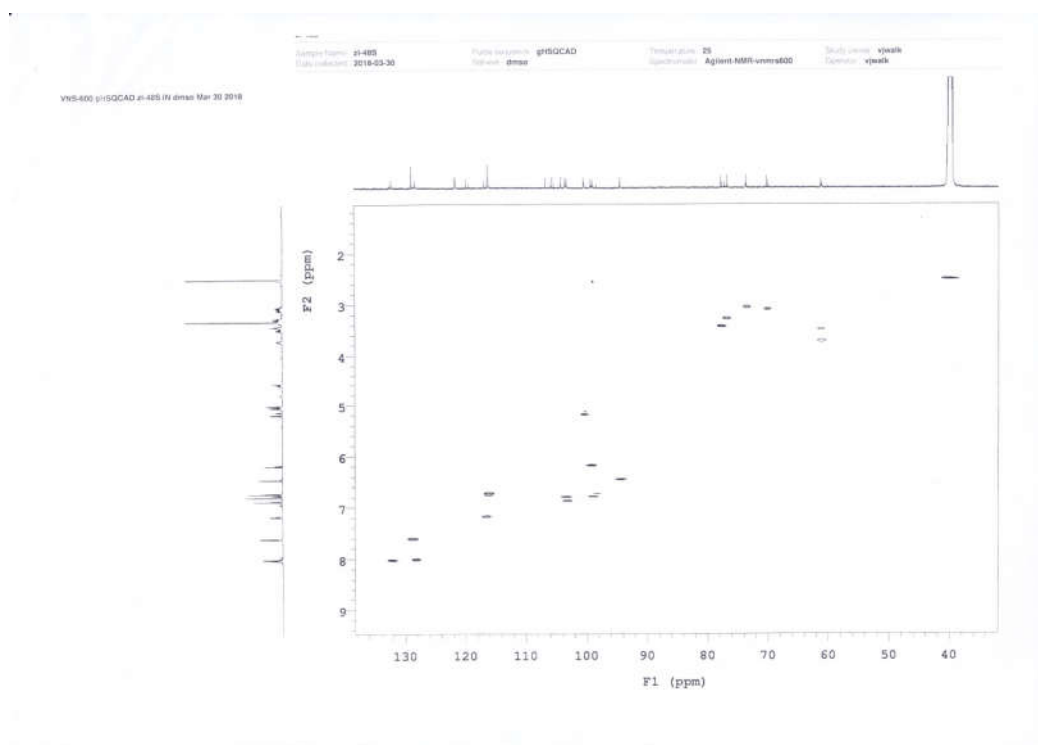

Figure S3. HSQC spectrum of Amentoflavone 7''-O- $\beta$ -D-glucopyranoside (1) in DMSO- $d_6$

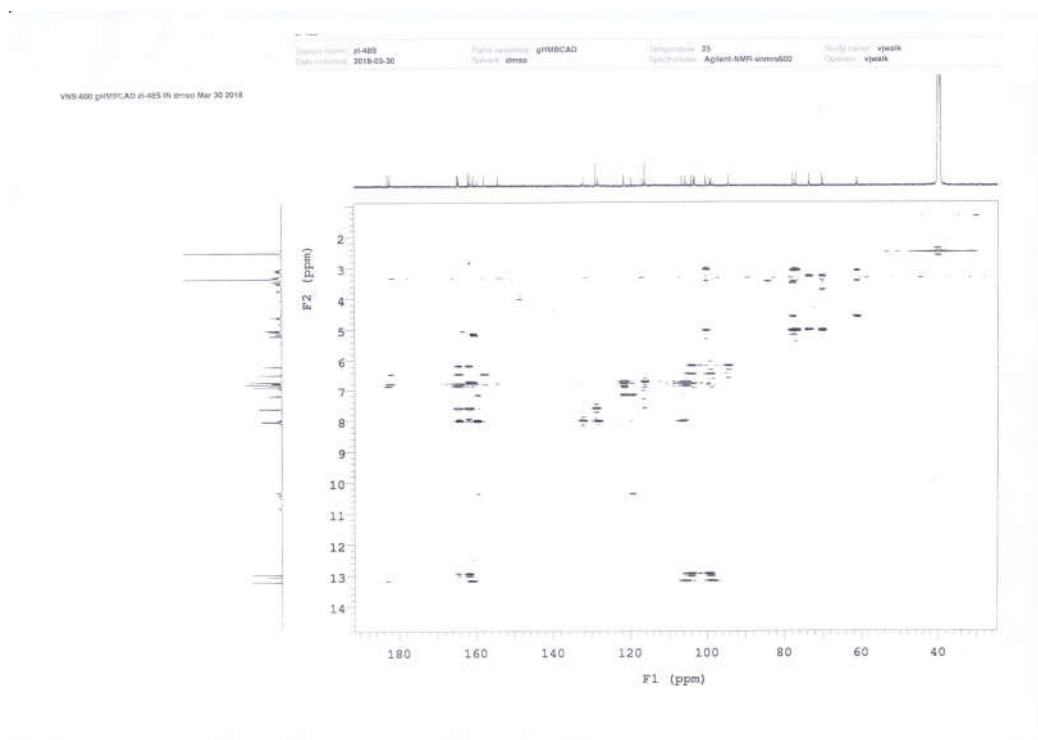

Figure S4. HMBC spectrum of Amentoflavone 7''-O- $\beta$ -D-glucopyranoside (1) in DMSO- $d_6$

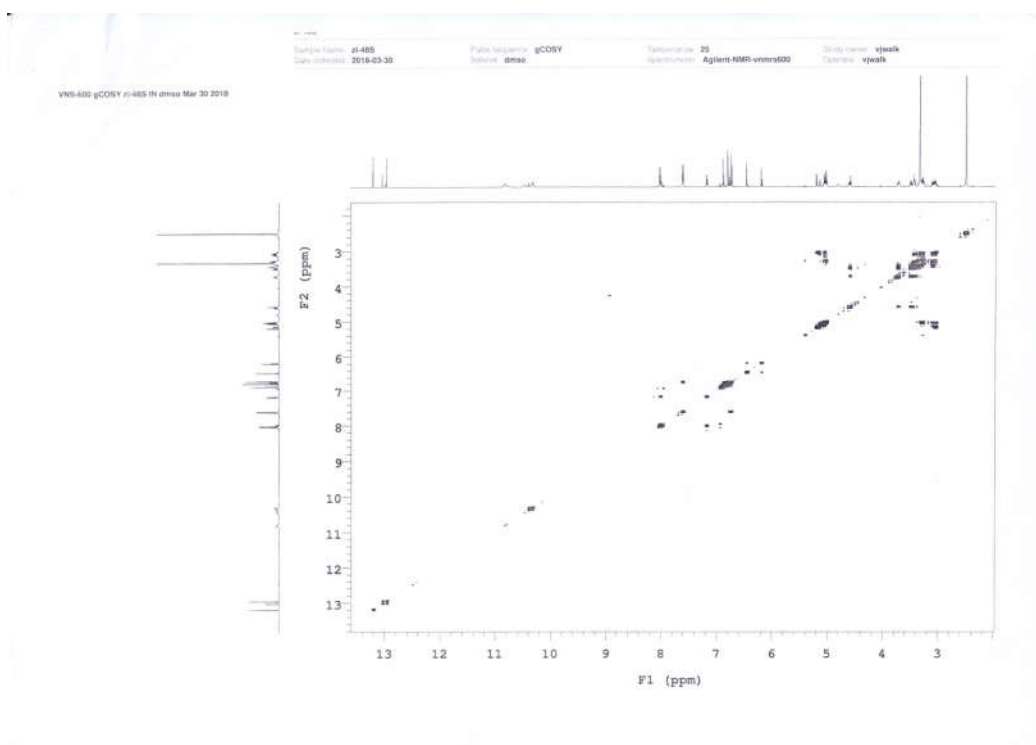

Figure S5. H-H COSY spectrum of Amentoflavone 7''-O- $\beta$ -D-glucopyranoside (1) in DMSO- $d_6$

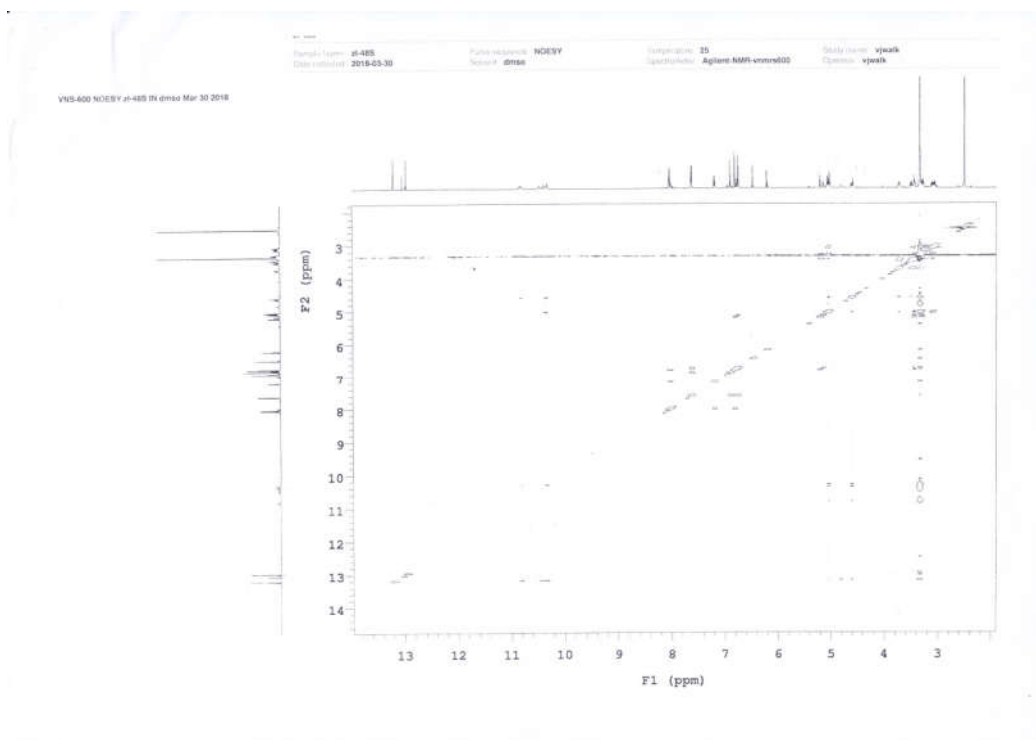

Figure S6. NOESY spectrum of Amentoflavone 7''-O-β-D-glucopyranoside (1) in DMSO-*d*<sub>6</sub>

| Qualitative Analysis Report |            |               |                             |
|-----------------------------|------------|---------------|-----------------------------|
| Data Filename               | 4211.d     | Sample Name   | 21-48s                      |
| Instrument Name             | TOF G6230A | Acquired Time | 2018-08-07                  |
| Acq Method                  | YCL.M      | Acquired SW   | 6200 series TOF/6500 series |
| IRM Calibration Status      | Success    |               |                             |
| User Chromatograms          |            |               |                             |

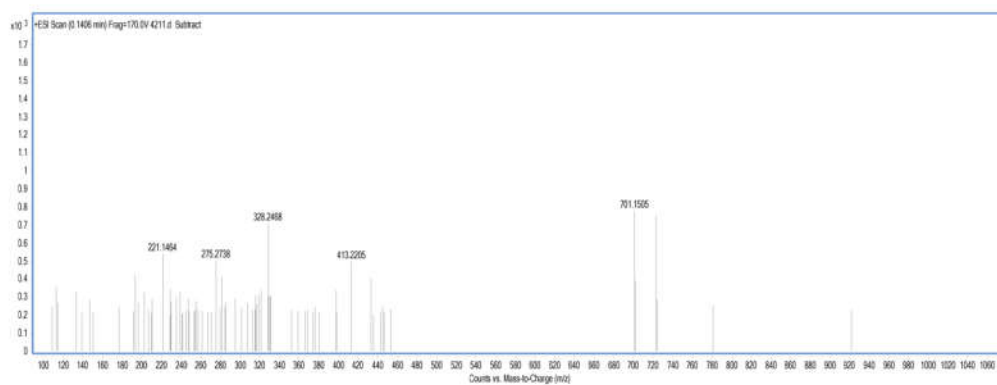

Figure S7. HR-ESI-MS spectrum of Amentoflavone 7''-O-β-D-glucopyranoside (1)

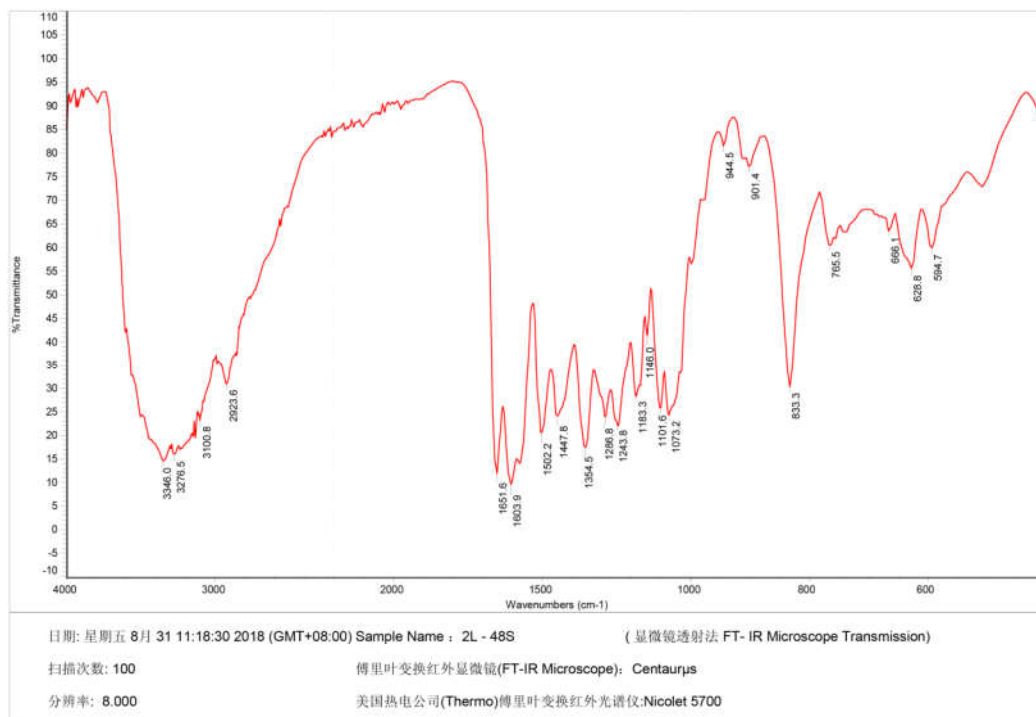

Figure S8. IR spectrum of Amentoflavone 7''-O-β-D-glucopyranoside (1)
